# Supplementary material for: Pump-less, recirculating organ-on-a-chip (rOoC) platform
Source: bioRxiv preprint, doi:10.1101/2022.09.06.506239, version 2 (2022-10-01)
Supplement: Suppl. Table [file 506239_file03.xlsx]

## Sheet: calibration-wideChan
measured velocity [um/s]	set flow Rate [uL/min]	set velocity [um/s]	factor		width [mm]	3.2
1126.27	300	3125	2.77465		heigth [mm]	0.5
1599.54	300	3125	1.95369
2115.59	300	3125	1.47713		average	1.84389
1173.72	300	3125	2.66247		stdabw	0.398422
1508.76	300	3125	2.07124
2032.85	300	3125	1.53725
1109.8	300	3125	2.81582
1890.7	300	3125	1.65283
1583.41	300	3125	1.97359
1347.43	300	3125	2.31923
2093.24	300	3125	1.4929
1340.67	300	3125	2.33092
1461.04	300	3125	2.13889
1993.64	300	3125	1.56748
1278.03	300	3125	2.44517
1627.83	300	3125	1.91973
1836.2	300	3125	1.70188
1355.91	300	3125	2.30473
1468.65	300	3125	2.1278
1760.79	300	3125	1.77477
1303.98	300	3125	2.39651
1795.6	300	3125	1.74037
1417.83	300	3125	2.20407
1125.27	300	3125	2.77711
2205.75	300	3125	1.41675
1189.08	300	3125	2.62808
1426.28	300	3125	2.19101
2200.43	300	3125	1.42018
1169.11	300	3125	2.67297
1429.17	300	3125	2.18658
2052.12	300	3125	1.52282
1194.33	300	3125	2.61653
1539.2	300	3125	2.03028
1632.43	300	3125	1.91432
1236.88	300	3125	2.52652
1707.03	300	3125	1.83066
1572.87	300	3125	1.98681
1294.84	300	3125	2.41343
1927.57	300	3125	1.62121
1319.34	300	3125	2.36861
1370.56	300	3125	2.28009
1956.74	300	3125	1.59704
1142.57	300	3125	2.73506
1497.63	300	3125	2.08663
1578.32	300	3125	1.97995
1235.89	300	3125	2.52854
1692.6	300	3125	1.84627
1731.46	300	3125	1.80484
1272.09	300	3125	2.45659
1837.25	300	3125	1.70091
1670.57	300	3125	1.87062
1207.38	300	3125	2.58825
1899.11	300	3125	1.64551
1680.67	300	3125	1.85938
1022.86	300	3125	3.05516
2043.63	300	3125	1.52914
1322.98	300	3125	2.36209
1388.3	300	3125	2.25095
1944.34	300	3125	1.60723
1190.71	300	3125	2.62448
1511.69	300	3125	2.06722
1731.19	300	3125	1.80512
1018.63	300	3125	3.06785
1631.17	300	3125	1.9158
1612.52	300	3125	1.93796
900.804	300	3125	3.46912
2026.76	300	3125	1.54187
1547.73	300	3125	2.01909
1112.13	300	3125	2.80992
1879.99	300	3125	1.66224
1365.3	300	3125	2.28887
1286.78	300	3125	2.42854
1901.15	300	3125	1.64374
1055.86	300	3125	2.95967
1666.46	300	3125	1.87523
1761.53	300	3125	1.77403
1161.86	300	3125	2.68965
1621.18	300	3125	1.92761
1692.78	300	3125	1.84608
1178.53	300	3125	2.65161
1605.9	300	3125	1.94595
1616.43	300	3125	1.93327
1220.39	300	3125	2.56066
1728.89	300	3125	1.80752
1136.15	300	3125	2.75052
1520.65	300	3125	2.05504
1849.18	300	3125	1.68994
1110.03	300	3125	2.81524
1641.97	300	3125	1.9032
1679.51	300	3125	1.86066
1206.73	300	3125	2.58964
1576.44	300	3125	1.98231
1752.98	300	3125	1.78268
1022.66	300	3125	3.05576
1883.56	300	3125	1.65909
1336.34	300	3125	2.33848
1170.72	300	3125	2.6693
2196.56	300	3125	1.42268
978.273	300	3125	3.1944
1565.95	300	3125	1.99559
1758.19	300	3125	1.7774
1327.98	300	3125	2.3532
1492.82	300	3125	2.09335
1707.84	300	3125	1.8298
1040.78	300	3125	3.00256
1533.77	300	3125	2.03746
1644.66	300	3125	1.90009
1246.37	300	3125	2.50728
1717.18	300	3125	1.81984
1517.06	300	3125	2.05991
1200.54	300	3125	2.603
1615.64	300	3125	1.93422
1369.76	300	3125	2.28142
1301.41	300	3125	2.40124
1893.04	300	3125	1.65078
1004.37	300	3125	3.1114
1680.61	300	3125	1.85944
1734.42	300	3125	1.80176
1246.76	300	3125	2.5065
1549.02	300	3125	2.0174
1811.88	300	3125	1.72473
1194.89	300	3125	2.6153
1834.35	300	3125	1.7036
1661.18	300	3125	1.88119
937.885	300	3125	3.33197
2018.9	300	3125	1.54787
1437.06	300	3125	2.17458
1067.85	300	3125	2.92644
2200.41	300	3125	1.42019
1392.38	300	3125	2.24436
1193.7	300	3125	2.61791
2005.89	300	3125	1.55791
1124.39	300	3125	2.77928
1687.12	300	3125	1.85227
1617.11	300	3125	1.93246
1264.85	300	3125	2.47065
1601.39	300	3125	1.95143
1535.91	300	3125	2.03462
1113.6	300	3125	2.80621
1865.48	300	3125	1.67517
1744.14	300	3125	1.79171
1191.05	300	3125	2.62374
2008.51	300	3125	1.55588
1549.22	300	3125	2.01714
1373.27	300	3125	2.27559
1882.19	300	3125	1.6603
1227.56	300	3125	2.5457
1837.98	300	3125	1.70024
1626.26	300	3125	1.92159
1135	300	3125	2.7533
1699.27	300	3125	1.83902
1826.1	300	3125	1.7113
1164.39	300	3125	2.68381
1878.28	300	3125	1.66376
1445.17	300	3125	2.16238
1221.65	300	3125	2.55802
1877.15	300	3125	1.66476
1401.39	300	3125	2.22993
1535.24	300	3125	2.03551
1674.71	300	3125	1.86599
1306.28	300	3125	2.39229
1696.09	300	3125	1.84247
1717.2	300	3125	1.81982
1044.49	300	3125	2.99189
1735.89	300	3125	1.80023
1739.51	300	3125	1.79648
1003.52	300	3125	3.11404
1887.07	300	3125	1.65601
1674.48	300	3125	1.86625
1121.57	300	3125	2.78627
1838.28	300	3125	1.69996
1289.3	300	3125	2.4238
1448.84	300	3125	2.1569
1941.86	300	3125	1.60928
1138	300	3125	2.74605
1486.33	300	3125	2.10249
1944.66	300	3125	1.60696
1136.44	300	3125	2.74982
1453.44	300	3125	2.15007
1933.56	300	3125	1.61619
1093.01	300	3125	2.85908
1680.52	300	3125	1.85954
1639.06	300	3125	1.90658
1367.31	300	3125	2.28551
1688.07	300	3125	1.85123
1291.06	300	3125	2.42049
1236.02	300	3125	2.52828
1937.96	300	3125	1.61252
1530.21	300	3125	2.0422
1283.93	300	3125	2.43393
2066.01	300	3125	1.51258
1078.41	300	3125	2.89778
1289.85	300	3125	2.42276
2013.11	300	3125	1.55232
1096.88	300	3125	2.84899
1714.81	300	3125	1.82236
1795.91	300	3125	1.74006
1013.89	300	3125	3.08219
1729.79	300	3125	1.80658
1591.25	300	3125	1.96386
1200.53	300	3125	2.60302
1824.63	300	3125	1.71268
1587.69	300	3125	1.96827
1048.17	300	3125	2.98139
2279.83	300	3125	1.37072
974.993	300	3125	3.20515
1400.84	300	3125	2.2308
1899.22	300	3125	1.64541
1181.33	300	3125	2.64532
1542.36	300	3125	2.02612
1672.42	300	3125	1.86855
1090.68	300	3125	2.86519
1915.45	300	3125	1.63147
1493.82	300	3125	2.09195
1205.12	300	3125	2.5931
2047.46	300	3125	1.52628
1015.36	300	3125	3.07773
1494.13	300	3125	2.09152
1994.76	300	3125	1.5666
1252.07	300	3125	2.49587
1422.06	300	3125	2.19752
1683.47	300	3125	1.85628
1320.28	300	3125	2.36692
1779.94	300	3125	1.75568
1624.27	300	3125	1.92394
1079.74	300	3125	2.89422
1750.86	300	3125	1.78484
1560.11	300	3125	2.00306
935.898	300	3125	3.33904
1816.33	300	3125	1.7205
1545.6	300	3125	2.02187
1341.3	300	3125	2.32983
2024.05	300	3125	1.54393
1279.74	300	3125	2.4419
1415.4	300	3125	2.20786
1782.47	300	3125	1.75319
1164.64	300	3125	2.68323
1564.24	300	3125	1.99778
1870.68	300	3125	1.67052
886.648	300	3125	3.52451
1890.6	300	3125	1.65291
1829.64	300	3125	1.70799
1157.75	300	3125	2.6992
1836.41	300	3125	1.70169
1363.55	300	3125	2.29181
1289.57	300	3125	2.42329
1599.65	300	3125	1.95355
1301.66	300	3125	2.40078
1520.62	300	3125	2.05508
2164.6	300	3125	1.44368
978.04	300	3125	3.19517
1559.55	300	3125	2.00378
1837.75	300	3125	1.70045
906.905	300	3125	3.44579
1766.52	300	3125	1.76901
1884.05	300	3125	1.65866
1096.25	300	3125	2.85063
1818.77	300	3125	1.71819
1389.23	300	3125	2.24945
1341.56	300	3125	2.32938
1770.54	300	3125	1.765
1122.58	300	3125	2.78377
1364.45	300	3125	2.2903
2221.13	300	3125	1.40694
1097.97	300	3125	2.84616
1522.06	300	3125	2.05314
2054.99	300	3125	1.52069
1389.61	300	3125	2.24883
1665.3	300	3125	1.87654
1634.58	300	3125	1.91181
1297.14	300	3125	2.40915
1687.82	300	3125	1.8515
1482.93	300	3125	2.10731
1155.76	300	3125	2.70385
1983.47	300	3125	1.57552
1392.08	300	3125	2.24484
1146.53	300	3125	2.72562
1960	300	3125	1.59439
1550.45	300	3125	2.01554
1216.16	300	3125	2.56956
1900.19	300	3125	1.64457
1199.13	300	3125	2.60606
1727.99	300	3125	1.80846
1662.45	300	3125	1.87976
1339.84	300	3125	2.33237
1753.84	300	3125	1.7818
1518.58	300	3125	2.05784
1279.63	300	3125	2.44211
2210.96	300	3125	1.41341
1359.17	300	3125	2.2992
1143.5	300	3125	2.73284
2182.16	300	3125	1.43207
1133.17	300	3125	2.75775
1668.13	300	3125	1.87336
1692.6	300	3125	1.84627
1362.07	300	3125	2.2943
1696.87	300	3125	1.84163
1763.75	300	3125	1.77179
1183.81	300	3125	2.63978
1690.59	300	3125	1.84847
1726.19	300	3125	1.81035
1042.69	300	3125	2.99706
1967.42	300	3125	1.58837
1743.79	300	3125	1.79207
1160.68	300	3125	2.69239
1990.4	300	3125	1.57004
1353.09	300	3125	2.30953
1268.7	300	3125	2.46315
1731.4	300	3125	1.8049
1281.61	300	3125	2.43834
1444.79	300	3125	2.16294
1578.73	300	3125	1.97944
1078.3	300	3125	2.89808
1840.48	300	3125	1.69793
1734.47	300	3125	1.8017
1072.99	300	3125	2.91242
1958.72	300	3125	1.59543
1574.36	300	3125	1.98493
1187.48	300	3125	2.63162
1975.45	300	3125	1.58192
1384.72	300	3125	2.25677
1330.31	300	3125	2.34908
1989.95	300	3125	1.57039
1238.33	300	3125	2.52356
1749.9	300	3125	1.78582
2125.85	300	3125	1.47
1196.46	300	3125	2.61187
1805.49	300	3125	1.73083
1575.68	300	3125	1.98327
1273.89	300	3125	2.45312
1573.28	300	3125	1.9863
1809.56	300	3125	1.72694
1171.2	300	3125	2.6682
1910.25	300	3125	1.63591
1457.73	300	3125	2.14374
1389.47	300	3125	2.24906
1927.31	300	3125	1.62143
1288.42	300	3125	2.42545
1394.47	300	3125	2.24099
2043.58	300	3125	1.52918
1250.03	300	3125	2.49994
1358.97	300	3125	2.29954
1728.77	300	3125	1.80764
1174.44	300	3125	2.66084
1765.23	300	3125	1.77031
1489.36	300	3125	2.09822
1035.74	300	3125	3.01717
1963.7	300	3125	1.59138
1369.14	300	3125	2.28245
1259.2	300	3125	2.48173
1962.08	300	3125	1.5927
1167.2	300	3125	2.67735
1526.13	300	3125	2.04766
1928.75	300	3125	1.62022
1073.04	300	3125	2.91229
1840.84	300	3125	1.69759
1788.57	300	3125	1.74721
1083.13	300	3125	2.88516
1869.27	300	3125	1.67178
1475.93	300	3125	2.11731
1409.92	300	3125	2.21644
2051.37	300	3125	1.52337
1266.22	300	3125	2.46798
1123.54	300	3125	2.78139
1964.86	300	3125	1.59044
1404.15	300	3125	2.22555
1357.39	300	3125	2.30221
1845.92	300	3125	1.69292
1496.85	300	3125	2.08772
1538.32	300	3125	2.03144
1903.3	300	3125	1.64189
1038.02	300	3125	3.01054
1925.97	300	3125	1.62256
1579.75	300	3125	1.97816
1153.67	300	3125	2.70875
1944.79	300	3125	1.60686
1573.04	300	3125	1.9866
1251.88	300	3125	2.49625
2133.29	300	3125	1.46487
1417.02	300	3125	2.20533
1247.98	300	3125	2.50405
2101.88	300	3125	1.48676
1198.85	300	3125	2.60666
1488.49	300	3125	2.09944
1978.86	300	3125	1.57919
1107.5	300	3125	2.82167
1576.24	300	3125	1.98257
1572.65	300	3125	1.98709
1107.04	300	3125	2.82284
1889.88	300	3125	1.65354
1554.84	300	3125	2.00985
914.592	300	3125	3.41682
1684.52	300	3125	1.85513
1579.11	300	3125	1.97896
1231.79	300	3125	2.53696
1891.6	300	3125	1.65204
1134.88	300	3125	2.7536
1529.91	300	3125	2.0426
2036.9	300	3125	1.53419
1115.13	300	3125	2.80236
1719.57	300	3125	1.81731
1633.61	300	3125	1.91294
1197.63	300	3125	2.60932
1678.95	300	3125	1.86128
1864.7	300	3125	1.67587
1262.62	300	3125	2.47501
2049.77	300	3125	1.52456
1239.83	300	3125	2.52051
1276.97	300	3125	2.4472
1840.05	300	3125	1.69832
1347.25	300	3125	2.31954
1377.88	300	3125	2.26798
1975.48	300	3125	1.58189
1145.7	300	3125	2.72759
1727.41	300	3125	1.80907
1955.78	300	3125	1.59783
1137.2	300	3125	2.74798
1645.44	300	3125	1.89919
1361.47	300	3125	2.29531
1409.59	300	3125	2.21696
1673.94	300	3125	1.86685
1180.99	300	3125	2.64609
1504.24	300	3125	2.07746
1987.26	300	3125	1.57252
1376.41	300	3125	2.2704
1470.22	300	3125	2.12553
1813.95	300	3125	1.72276
876	300	3125	3.56735
1674.14	300	3125	1.86663
1935.46	300	3125	1.6146
928.947	300	3125	3.36402
1691.55	300	3125	1.84742
1610.91	300	3125	1.9399
1116.16	300	3125	2.79978
1626.51	300	3125	1.92129
1451.72	300	3125	2.15262
1387.42	300	3125	2.25238
1728.02	300	3125	1.80843
1256.45	300	3125	2.48717
1240.3	300	3125	2.51955
2101	300	3125	1.48739
1077.75	300	3125	2.89956
1652.33	300	3125	1.89127
1730.29	300	3125	1.80606
1133.79	300	3125	2.75624
1770.93	300	3125	1.76461
1414.68	300	3125	2.20898
1240.23	300	3125	2.51969
1785.05	300	3125	1.75065
1492.67	300	3125	2.09356
982.932	300	3125	3.17926
2064.85	300	3125	1.51343
1546.08	300	3125	2.02124
1156.03	300	3125	2.70322
2182.32	300	3125	1.43196
1332.36	300	3125	2.34546
1311.73	300	3125	2.38235
1866.83	300	3125	1.67396
1194.33	300	3125	2.61653
1569.1	300	3125	1.99159
1710.37	300	3125	1.82709
1374.06	300	3125	2.27428
1653.53	300	3125	1.8899
1688.57	300	3125	1.85068
996.034	300	3125	3.13744
2175.19	300	3125	1.43666
1493.87	300	3125	2.09188
1165.09	300	3125	2.6822
1860.19	300	3125	1.67994
1362.99	300	3125	2.29275
1466.55	300	3125	2.13085
1908.65	300	3125	1.63728
1338.62	300	3125	2.33449
1435.87	300	3125	2.17638
1885.71	300	3125	1.6572
829.886	300	3125	3.76558
1816.69	300	3125	1.72016
1748.2	300	3125	1.78755
1078.38	300	3125	2.89787
1964.61	300	3125	1.59065
1388.34	300	3125	2.25089
1224.61	300	3125	2.55183
1959.55	300	3125	1.59475
1287.07	300	3125	2.428
1441.95	300	3125	2.1672
1744.54	300	3125	1.7913
1219.28	300	3125	2.56299
1714.76	300	3125	1.82241
1544.21	300	3125	2.02369
1254.06	300	3125	2.49191
1871.89	300	3125	1.66944
1524.4	300	3125	2.04999
1272.36	300	3125	2.45607
1776.97	300	3125	1.75861
1450.27	300	3125	2.15477
1391.19	300	3125	2.24628
1827.29	300	3125	1.71018
1202.5	300	3125	2.59875
1603.6	300	3125	1.94874
2033.07	300	3125	1.53708
895.349	300	3125	3.49026
1305.61	300	3125	2.39352
2032.7	300	3125	1.53736
1147.78	300	3125	2.72265
1615.11	300	3125	1.93485
1635.09	300	3125	1.91121
1093.53	300	3125	2.85772
1474.45	300	3125	2.11943
1846.77	300	3125	1.69214
1278.98	300	3125	2.44335
1833.29	300	3125	1.70459
1300.99	300	3125	2.40202
1213.35	300	3125	2.57551
2031.1	300	3125	1.53858
1282.24	300	3125	2.43714
1265.91	300	3125	2.46858
1901.05	300	3125	1.64383
1113.57	300	3125	2.80629
1644.67	300	3125	1.90008
1764.67	300	3125	1.77087
999.998	300	3125	3.12501
1894.63	300	3125	1.6494
1559.35	300	3125	2.00404
829.229	300	3125	3.76856
2102.82	300	3125	1.4861
1469.82	300	3125	2.12611
1162.54	300	3125	2.68808
1991.92	300	3125	1.56884
1263.3	300	3125	2.47368
1242.23	300	3125	2.51564
2003.54	300	3125	1.55974
1199.02	300	3125	2.6063
1466.26	300	3125	2.13127
1732.37	300	3125	1.80389
1244.56	300	3125	2.51093
1588.83	300	3125	1.96686
1716.83	300	3125	1.82022
1220.49	300	3125	2.56045
1747.83	300	3125	1.78793
1621.11	300	3125	1.92769
1280.85	300	3125	2.43979
1826.44	300	3125	1.71098
1394.55	300	3125	2.24087
1550.7	300	3125	2.01522
1757.02	300	3125	1.77858
1409.81	300	3125	2.21661
1577.73	300	3125	1.98069
1656.06	300	3125	1.88701
1192.39	300	3125	2.62079
1688.62	300	3125	1.85062
1871.98	300	3125	1.66936
815.954	300	3125	3.82987
2161.37	300	3125	1.44584
1462.86	300	3125	2.13623
1230.69	300	3125	2.53923
2089.54	300	3125	1.49554
1493.79	300	3125	2.09199
1331.65	300	3125	2.34671
1829.05	300	3125	1.70854
1307.68	300	3125	2.38973
1701.02	300	3125	1.83713
1689.8	300	3125	1.84933
1204.34	300	3125	2.59478
1841.61	300	3125	1.69688
1763.81	300	3125	1.77173
1163.22	300	3125	2.68651
1696.06	300	3125	1.84251
1560.11	300	3125	2.00306
1382.47	300	3125	2.26045
1743.1	300	3125	1.79278
1451.7	300	3125	2.15265
1294.47	300	3125	2.41412
2105.39	300	3125	1.48429
1007.68	300	3125	3.10118
1490.38	300	3125	2.09678
1794.93	300	3125	1.74101
1035	300	3125	3.01932
1883.76	300	3125	1.65892
1858.55	300	3125	1.68142
970.97	300	3125	3.21843
1856.86	300	3125	1.68295
1689.88	300	3125	1.84924
1010.06	300	3125	3.09388
1763.79	300	3125	1.77175
1448.96	300	3125	2.15672
1360.68	300	3125	2.29665
1953.41	300	3125	1.59977
1137	300	3125	2.74846
1441.69	300	3125	2.16759
1964.95	300	3125	1.59037
1575.23	300	3125	1.98384
1219.25	300	3125	2.56305
2132.42	300	3125	1.46547
1139.4	300	3125	2.74267
1906.57	300	3125	1.63907
1407.03	300	3125	2.22099
1439.44	300	3125	2.17098
2059.94	300	3125	1.51703
1197.5	300	3125	2.6096
928.006	300	3125	3.36744
2258.04	300	3125	1.38394
1252.32	300	3125	2.49537
998.721	300	3125	3.129
2217.42	300	3125	1.4093
1307.25	300	3125	2.39051
1476.34	300	3125	2.11672
1745.51	300	3125	1.79031
1235.13	300	3125	2.5301
1521.14	300	3125	2.05438
1574.29	300	3125	1.98502
1015.78	300	3125	3.07645
1822.25	300	3125	1.71491
1432.11	300	3125	2.18209
1243.54	300	3125	2.51299
1769	300	3125	1.76653
1370.08	300	3125	2.28089
1330.09	300	3125	2.34947
2037.18	300	3125	1.53398
1271.2	300	3125	2.45831
1572.4	300	3125	1.98741
1533.97	300	3125	2.0372
979.57	300	3125	3.19018
2045.24	300	3125	1.52794
1906.48	300	3125	1.63915
941.514	300	3125	3.31912
2010.31	300	3125	1.55449
1392.68	300	3125	2.24388
1095.28	300	3125	2.85315
2367.75	300	3125	1.31982
1098.06	300	3125	2.84593
1642.78	300	3125	1.90226
1682.97	300	3125	1.85684
1432.11	300	3125	2.18209
1459.99	300	3125	2.14043
1793.24	300	3125	1.74266
1235.57	300	3125	2.5292
1678.28	300	3125	1.86203
1887.42	300	3125	1.6557
1137.87	300	3125	2.74636
1839.26	300	3125	1.69905
1530.49	300	3125	2.04183
1073.84	300	3125	2.91012
1675.78	300	3125	1.8648
1469.9	300	3125	2.12599
1387.42	300	3125	2.25238
2031.81	300	3125	1.53804
1038.95	300	3125	3.00784
1674.99	300	3125	1.86568
1881.91	300	3125	1.66055
1350.24	300	3125	2.3144
1628.35	300	3125	1.91912
2063.01	300	3125	1.51478
1029.56	300	3125	3.03528
1660.11	300	3125	1.88241
1529.7	300	3125	2.04288
1257.36	300	3125	2.48537
1884.59	300	3125	1.65819
1383.22	300	3125	2.25922
1332.25	300	3125	2.34566
2079.47	300	3125	1.50279
1267.35	300	3125	2.46578
1300.35	300	3125	2.4032
2262.48	300	3125	1.38123
966.081	300	3125	3.23472
1704.49	300	3125	1.83339
1823.77	300	3125	1.71348
1342	300	3125	2.32861
1635.23	300	3125	1.91105
1860.12	300	3125	1.68
1274.05	300	3125	2.45281
1855.18	300	3125	1.68447
1510.33	300	3125	2.06908
1182.64	300	3125	2.64239
2080.67	300	3125	1.50192
1469.6	300	3125	2.12643
1076.27	300	3125	2.90355
1999.85	300	3125	1.56262
1279.11	300	3125	2.4431
1499.75	300	3125	2.08368
1737.63	300	3125	1.79843
1173.8	300	3125	2.66229
1498.23	300	3125	2.08579
1753.05	300	3125	1.78261
1134.38	300	3125	2.75481
1940.06	300	3125	1.61077
1462.88	300	3125	2.1362
1190.35	300	3125	2.62528
1879.91	300	3125	1.66231
1521.34	300	3125	2.05411
1383.66	300	3125	2.2585
1751.37	300	3125	1.78432
1323.32	300	3125	2.36148
1551.29	300	3125	2.01445
1860.58	300	3125	1.67958
1024.68	300	3125	3.04973
1885.04	300	3125	1.65779
1585.99	300	3125	1.97038
1291.87	300	3125	2.41897
1723.85	300	3125	1.8128
1622.43	300	3125	1.92612
1353.59	300	3125	2.30868
1760.16	300	3125	1.77541
1462.08	300	3125	2.13737
1301.08	300	3125	2.40185
1985.5	300	3125	1.57391
1373.96	300	3125	2.27445
1713.82	300	3125	1.82341
1631.35	300	3125	1.91559
1289.14	300	3125	2.4241
1502.28	300	3125	2.08017
1827.24	300	3125	1.71023
875.588	300	3125	3.56903
1579.51	300	3125	1.97846
1926.9	300	3125	1.62178
1134.87	300	3125	2.75362
1791.73	300	3125	1.74412
1580.25	300	3125	1.97754
1221.53	300	3125	2.55827
1957.27	300	3125	1.59661
1120.55	300	3125	2.78881
1428.37	300	3125	2.18781
2333.61	300	3125	1.33913
957.483	300	3125	3.26377
1401.1	300	3125	2.23039
1982.63	300	3125	1.57619
1167.09	300	3125	2.6776
1683.91	300	3125	1.8558
1753.88	300	3125	1.78176
1134.99	300	3125	2.75333
1789.42	300	3125	1.74638
1716.13	300	3125	1.82096
1244.99	300	3125	2.51006
1993.91	300	3125	1.56727
1339.78	300	3125	2.33247
1543.45	300	3125	2.02468
1828.38	300	3125	1.70916
1267.98	300	3125	2.46455
1474.5	300	3125	2.11936
2063.07	300	3125	1.51473
990.4	300	3125	3.15529
1732.55	300	3125	1.8037
1623.41	300	3125	1.92496
1182.5	300	3125	2.64271
1785.62	300	3125	1.75009
1566.26	300	3125	1.9952
1125.02	300	3125	2.77773
1888.85	300	3125	1.65445
1207.23	300	3125	2.58857
1280.88	300	3125	2.43973
2160.25	300	3125	1.44659
1563.82	300	3125	1.99831
1359.97	300	3125	2.29784
1890.8	300	3125	1.65274
1173.09	300	3125	2.6639
1847.02	300	3125	1.69191
1718.51	300	3125	1.81844
1231.99	300	3125	2.53655
1612.96	300	3125	1.93743
1758.59	300	3125	1.77699
1169.42	300	3125	2.67226
1924.24	300	3125	1.62402
1077.34	300	3125	2.90066
1259.56	300	3125	2.48103
2081.21	300	3125	1.50153
1385.73	300	3125	2.25513
1614.64	300	3125	1.93542
1749.78	300	3125	1.78594
1198.11	300	3125	2.60827
1872.6	300	3125	1.6688
1644.74	300	3125	1.9
870.983	300	3125	3.5879
1913.22	300	3125	1.63337
1728.07	300	3125	1.80838
1072.61	300	3125	2.91345
2030.18	300	3125	1.53927
1329.88	300	3125	2.34984
1258.73	300	3125	2.48266
2085.83	300	3125	1.4982
1237.67	300	3125	2.52491
1378.57	300	3125	2.26684
1868.59	300	3125	1.67238
1243.94	300	3125	2.51218
1625.95	300	3125	1.92195
2029.45	300	3125	1.53983
987.739	300	3125	3.16379
1909.85	300	3125	1.63625
1830.81	300	3125	1.70689
1081.67	300	3125	2.88905
2066.98	300	3125	1.51187
1340.75	300	3125	2.33079
1378.37	300	3125	2.26717
1924	300	3125	1.62422
1364.58	300	3125	2.29008
1528.64	300	3125	2.0443
2211.49	300	3125	1.41307
1062.12	300	3125	2.94223
1689.05	300	3125	1.85015
2021.45	300	3125	1.54592
1096.06	300	3125	2.85112
1702.17	300	3125	1.83589
1833.98	300	3125	1.70394
915.763	300	3125	3.41245
2055.2	300	3125	1.52053
1760.72	300	3125	1.77484
1202.47	300	3125	2.59882
1774.99	300	3125	1.76057
1319.28	300	3125	2.36872
1464.65	300	3125	2.13362
1826.52	300	3125	1.7109
1374.5	300	3125	2.27355
1488.72	300	3125	2.09912
2045.36	300	3125	1.52785
1099	300	3125	2.84349
1637.98	300	3125	1.90784
1741.52	300	3125	1.79441
1300.85	300	3125	2.40228
1977.7	300	3125	1.58012
1566.02	300	3125	1.9955
1111.83	300	3125	2.81068
2197.21	300	3125	1.42226
1465.1	300	3125	2.13296
1285.1	300	3125	2.43172
1945.75	300	3125	1.60606
1465.57	300	3125	2.13228
1359.6	300	3125	2.29847
1946.53	300	3125	1.60542
1410.86	300	3125	2.21496
1588.92	300	3125	1.96674
1885.12	300	3125	1.65772
876.076	300	3125	3.56704
1835.22	300	3125	1.70279
1681.21	300	3125	1.85878
1342.06	300	3125	2.32851
1974.3	300	3125	1.58284
1378.68	300	3125	2.26666
1316.31	300	3125	2.37406
1895.78	300	3125	1.6484
1260.28	300	3125	2.47961
1602.5	300	3125	1.95008
1810.94	300	3125	1.72562
1089.14	300	3125	2.86924
1743.48	300	3125	1.79239
1580.11	300	3125	1.97771
1265.48	300	3125	2.46942
2001.59	300	3125	1.56126
1580.45	300	3125	1.97728
1211.33	300	3125	2.57981
1982.51	300	3125	1.57628
1475.57	300	3125	2.11783
1331.83	300	3125	2.3464
2103.63	300	3125	1.48553
1395.86	300	3125	2.23876
1500.45	300	3125	2.08271
1963.53	300	3125	1.59152
1033.92	300	3125	3.02248
1798.65	300	3125	1.73741
1844.15	300	3125	1.69455
1069	300	3125	2.92329
1855.69	300	3125	1.68401
1749.31	300	3125	1.78642
1131.43	300	3125	2.76199
1866.12	300	3125	1.6746
1718.66	300	3125	1.81828
1118.38	300	3125	2.79422
2026	300	3125	1.54245
1427.38	300	3125	2.18933
1252.56	300	3125	2.49489
1851.76	300	3125	1.68758
1261.38	300	3125	2.47745
1509.07	300	3125	2.07081
1822.64	300	3125	1.71455
1132.77	300	3125	2.75872
1881.55	300	3125	1.66086
1705.15	300	3125	1.83268
1130.86	300	3125	2.76338
1829.33	300	3125	1.70828
1814.38	300	3125	1.72235
1241.1	300	3125	2.51793
1780.78	300	3125	1.75485
1475.42	300	3125	2.11804
1493.92	300	3125	2.09181
2115.34	300	3125	1.4773
1244.39	300	3125	2.51127
1825.9	300	3125	1.71148
1707	300	3125	1.8307
1174.38	300	3125	2.66098
1740.47	300	3125	1.79549
1772.9	300	3125	1.76265
1103.71	300	3125	2.83136
1949.83	300	3125	1.6027
1486.69	300	3125	2.10198
1286.05	300	3125	2.42992
1939.55	300	3125	1.6112
1403.62	300	3125	2.22639
1484.65	300	3125	2.10487
1788.7	300	3125	1.74708
1378.87	300	3125	2.26635
1444.48	300	3125	2.16341
1786.22	300	3125	1.7495
1208.38	300	3125	2.58611
1728.22	300	3125	1.80822
2053.7	300	3125	1.52164
1209.98	300	3125	2.58269
1880.08	300	3125	1.66216
1629.45	300	3125	1.91783
1245.91	300	3125	2.50821
1783.8	300	3125	1.75188
1382.3	300	3125	2.26072
1451.39	300	3125	2.15311
1885.35	300	3125	1.65752
1498.45	300	3125	2.08549
1364.9	300	3125	2.28955
1859.11	300	3125	1.68091
1471.07	300	3125	2.1243
1405.68	300	3125	2.22312
2005.15	300	3125	1.55849
1116.52	300	3125	2.79888
1745.04	300	3125	1.79079
1663.12	300	3125	1.879
1253.42	300	3125	2.49318
1911.77	300	3125	1.63461
1409.37	300	3125	2.2173
1327.46	300	3125	2.35412
2065.45	300	3125	1.51299
1265.82	300	3125	2.46876
1258.44	300	3125	2.48323
1904.21	300	3125	1.6411
1517.62	300	3125	2.05915
1248.92	300	3125	2.50216
2011.72	300	3125	1.5534
1160.76	300	3125	2.6922
1568.77	300	3125	1.99201
1727.34	300	3125	1.80914
1331.85	300	3125	2.34636
1646.48	300	3125	1.89799
1513.01	300	3125	2.06542
1091.2	300	3125	2.86382
2149.18	300	3125	1.45404
1396.72	300	3125	2.23738
1351.84	300	3125	2.31166
1887.19	300	3125	1.6559
1268.89	300	3125	2.46278
1584.47	300	3125	1.97227
2011.84	300	3125	1.5533
1069.41	300	3125	2.92217
1697.25	300	3125	1.84121
1804.19	300	3125	1.73208
954.111	300	3125	3.2753
2189.94	300	3125	1.42698
1570.22	300	3125	1.99017
1052.72	300	3125	2.9685
2008.27	300	3125	1.55607
1514.94	300	3125	2.06279
1306.76	300	3125	2.39141
2093.25	300	3125	1.49289
1321.46	300	3125	2.36481
1387.33	300	3125	2.25253
1857.78	300	3125	1.68212
1397.17	300	3125	2.23666
1636.66	300	3125	1.90938
1880.1	300	3125	1.66215
1272.97	300	3125	2.45489
1795.98	300	3125	1.74
1710.98	300	3125	1.82644
1163.16	300	3125	2.68665
1925.05	300	3125	1.62333
1468.05	300	3125	2.12867
1320.06	300	3125	2.36732
1906.12	300	3125	1.63946
1435.1	300	3125	2.17755
1450.03	300	3125	2.15513
1829.52	300	3125	1.7081
1166.46	300	3125	2.67905
1452.2	300	3125	2.15191
1803.44	300	3125	1.7328
1152.72	300	3125	2.71098
1788.43	300	3125	1.74734
1595.19	300	3125	1.95901
1131.63	300	3125	2.7615
1740.46	300	3125	1.7955
1592.6	300	3125	1.9622
1311.58	300	3125	2.38262
1814.61	300	3125	1.72213
1351.79	300	3125	2.31175
1391.06	300	3125	2.24649
1932.01	300	3125	1.61749
1198.85	300	3125	2.60666
1749.78	300	3125	1.78594
1919.14	300	3125	1.62833
1309.26	300	3125	2.38684
1633.36	300	3125	1.91323
1742.08	300	3125	1.79383
1109.73	300	3125	2.816
1942.81	300	3125	1.60849
1574.86	300	3125	1.9843
1216.15	300	3125	2.56958
2012.95	300	3125	1.55245
1306.2	300	3125	2.39244
1446.69	300	3125	2.1601
1802.8	300	3125	1.73341
1544.11	300	3125	2.02382
1529.55	300	3125	2.04308
1996.82	300	3125	1.56499
1215.95	300	3125	2.57001
1572.55	300	3125	1.98722
1880.71	300	3125	1.66161
1117.96	300	3125	2.79527
2126.61	300	3125	1.46947
1649.65	300	3125	1.89434
1083.56	300	3125	2.88401
2191.18	300	3125	1.42617
1404.63	300	3125	2.22479
1328.67	300	3125	2.35198
1998.23	300	3125	1.56388
1450.07	300	3125	2.15507
1314.6	300	3125	2.37715
1825.46	300	3125	1.7119
1294.73	300	3125	2.41363
1835.07	300	3125	1.70293
1664.54	300	3125	1.8774
1203.31	300	3125	2.597
2003.66	300	3125	1.55965
1675.98	300	3125	1.86458
1092.65	300	3125	2.86002
1984.24	300	3125	1.57491
1558.83	300	3125	2.00471
1261.48	300	3125	2.47725
1912.91	300	3125	1.63364
1427.63	300	3125	2.18894
1372.54	300	3125	2.2768
1800.31	300	3125	1.73581
1167.16	300	3125	2.67744
1655.41	300	3125	1.88775
1636.34	300	3125	1.90975
1243.48	300	3125	2.51311
1523.48	300	3125	2.05122
1962.03	300	3125	1.59274
1018.28	300	3125	3.0689
1978.31	300	3125	1.57963
1467.17	300	3125	2.12995
1494	300	3125	2.0917
1946.03	300	3125	1.60583
1378.33	300	3125	2.26724
1543.69	300	3125	2.02437
1795.2	300	3125	1.74075
1419.16	300	3125	2.20201
1592.6	300	3125	1.9622
1985.98	300	3125	1.57353
995.482	300	3125	3.13918
1876.18	300	3125	1.66562
1875.95	300	3125	1.66582
1277.06	300	3125	2.44703
1810.47	300	3125	1.72607
1719.86	300	3125	1.81701
1305.22	300	3125	2.39423
1930.83	300	3125	1.61847
1316.73	300	3125	2.3733
1376.27	300	3125	2.27063
2142.84	300	3125	1.45835
1119.47	300	3125	2.7915
1573.29	300	3125	1.98628
1944.09	300	3125	1.60744
1017.38	300	3125	3.07162
1618.86	300	3125	1.93037
1876.26	300	3125	1.66555
1117.45	300	3125	2.79655
1633.76	300	3125	1.91277
1506.72	300	3125	2.07404
1390.71	300	3125	2.24705
2054.08	300	3125	1.52136
1558.12	300	3125	2.00562
1197.93	300	3125	2.60867
1989.76	300	3125	1.57054
1360.79	300	3125	2.29646
1541.35	300	3125	2.02744
2060.98	300	3125	1.51627
1340.45	300	3125	2.33131
1765.19	300	3125	1.77035
1702.52	300	3125	1.83551
1128.51	300	3125	2.76914
1895.89	300	3125	1.6483
1486.39	300	3125	2.10241
1410.55	300	3125	2.21545
2157.83	300	3125	1.44821
1350.5	300	3125	2.31396
1366.32	300	3125	2.28717
2021.68	300	3125	1.54574
1505.34	300	3125	2.07594
1200.97	300	3125	2.60206
2023.05	300	3125	1.5447
1453.08	300	3125	2.1506
1480.81	300	3125	2.11033
1626.16	300	3125	1.92171
1312.33	300	3125	2.38126
1870.45	300	3125	1.67072
1591.31	300	3125	1.96379
1101.17	300	3125	2.83789
1766.01	300	3125	1.76953
1541.95	300	3125	2.02665
1266.95	300	3125	2.46655
2156.27	300	3125	1.44926
1351.68	300	3125	2.31194
1322.69	300	3125	2.36261
1898.77	300	3125	1.6458
1292.65	300	3125	2.41751
1481.83	300	3125	2.10888
1651.28	300	3125	1.89247
1169.87	300	3125	2.67124
1639.23	300	3125	1.90638
1715.67	300	3125	1.82145
1078.28	300	3125	2.89813
1983.66	300	3125	1.57537
1466.75	300	3125	2.13056
1205.43	300	3125	2.59244
2071	300	3125	1.50893
1489.13	300	3125	2.09854
1407.21	300	3125	2.22071
1711.45	300	3125	1.82594
1082.07	300	3125	2.88798
1751.25	300	3125	1.78444
1718.07	300	3125	1.8189
1150.74	300	3125	2.71564
1857.75	300	3125	1.68214
1761.93	300	3125	1.77362
1148.08	300	3125	2.72194
1885.35	300	3125	1.65752
1689.55	300	3125	1.8496
1075.6	300	3125	2.90536
1936.28	300	3125	1.61392
1444	300	3125	2.16413
1414.21	300	3125	2.20971
2052.2	300	3125	1.52276
1065.48	300	3125	2.93295
1554.27	300	3125	2.01059
1890.94	300	3125	1.65262
1194.32	300	3125	2.61655
1781.86	300	3125	1.75379
1860.81	300	3125	1.67938
1314.2	300	3125	2.37787
1905.3	300	3125	1.64016
1679.93	300	3125	1.8602
1117.13	300	3125	2.79735
1984.45	300	3125	1.57474
1442.01	300	3125	2.16711
1334.97	300	3125	2.34088
2130.36	300	3125	1.46689
1218.76	300	3125	2.56408
1511.03	300	3125	2.06813
2007.13	300	3125	1.55695
993.277	300	3125	3.14615
1421.37	300	3125	2.19858
1843.55	300	3125	1.6951
1113.59	300	3125	2.80624
1829.51	300	3125	1.70811
1887.35	300	3125	1.65576
1218.28	300	3125	2.56509
1900.32	300	3125	1.64446
1420.33	300	3125	2.20019
1454.36	300	3125	2.14871
1797.23	300	3125	1.73879
1240.44	300	3125	2.51927
1590.89	300	3125	1.96431
1486.69	300	3125	2.10198
1338.9	300	3125	2.33401
1564.06	300	3125	1.99801
1986.85	300	3125	1.57284
1388.76	300	3125	2.25021
1645.63	300	3125	1.89897
1650.23	300	3125	1.89368
1228.07	300	3125	2.54464
2074.58	300	3125	1.50633
1388.4	300	3125	2.25079
1230.93	300	3125	2.53873
2032.13	300	3125	1.5378
1441.52	300	3125	2.16785
1391.53	300	3125	2.24573
1939.85	300	3125	1.61095
1356.78	300	3125	2.30325
1617.19	300	3125	1.93236
1856.46	300	3125	1.68331
1254.7	300	3125	2.49064
1472.57	300	3125	2.12214
1738.22	300	3125	1.79782
1057.93	300	3125	2.95388
1925.72	300	3125	1.62277
1675.21	300	3125	1.86544
1117.27	300	3125	2.797
1983.45	300	3125	1.57554
1578.69	300	3125	1.97949
1221.08	300	3125	2.55921
1872.02	300	3125	1.66932
1353.49	300	3125	2.30885
1754.72	300	3125	1.78091
1795.58	300	3125	1.74038
1179.05	300	3125	2.65044
1733.88	300	3125	1.80232
1851.35	300	3125	1.68796
999.778	300	3125	3.12569
1856.69	300	3125	1.6831
1822.2	300	3125	1.71496
1141.98	300	3125	2.73648
2110.09	300	3125	1.48098
1568.7	300	3125	1.9921
1335.69	300	3125	2.33961
1982.65	300	3125	1.57617
1431.24	300	3125	2.18342
1338.79	300	3125	2.3342
2066.77	300	3125	1.51202
1252.21	300	3125	2.49559
1580.55	300	3125	1.97716
1942.14	300	3125	1.60905
954.323	300	3125	3.27457
1739.28	300	3125	1.79672
1965.75	300	3125	1.58972
1188.42	300	3125	2.62954
1830.97	300	3125	1.70675
1457.48	300	3125	2.14411
1487.87	300	3125	2.10032
2044.74	300	3125	1.52831
1462.45	300	3125	2.13683
1479.68	300	3125	2.11194
2048.24	300	3125	1.5257
1267.18	300	3125	2.46611
1569.26	300	3125	1.99138
2104.98	300	3125	1.48457
1026.35	300	3125	3.04477
1833.56	300	3125	1.70433
2081.95	300	3125	1.501
1337.81	300	3125	2.33591
1792.14	300	3125	1.74373
1372.54	300	3125	2.2768
1409.63	300	3125	2.21689
2103.56	300	3125	1.48558
1312.07	300	3125	2.38173
1281.05	300	3125	2.43941
2049.82	300	3125	1.52452
1417.18	300	3125	2.20508
1715.79	300	3125	1.82132
1685.67	300	3125	1.85386
1222.95	300	3125	2.5553
1921.74	300	3125	1.62613
1820.68	300	3125	1.71639
1292.46	300	3125	2.41787
2077.1	300	3125	1.5045
1656.23	300	3125	1.88682
1330.73	300	3125	2.34834
2031.82	300	3125	1.53803
1661.11	300	3125	1.88127
1290.74	300	3125	2.42109
2075.91	300	3125	1.50536
1303.87	300	3125	2.39671
1464.13	300	3125	2.13437
2069.83	300	3125	1.50979
1106.69	300	3125	2.82374
1940.44	300	3125	1.61046
1645.39	300	3125	1.89925
1191.44	300	3125	2.62288
1759.49	300	3125	1.77608
1994.01	300	3125	1.56719
1038.32	300	3125	3.00967
2014.68	300	3125	1.55111
1587.92	300	3125	1.96798
1337.6	300	3125	2.33627
1866.19	300	3125	1.67453
1644.88	300	3125	1.89983
1248.69	300	3125	2.50262
2076.41	300	3125	1.505
1493.91	300	3125	2.09183
1550.24	300	3125	2.01582
2032.74	300	3125	1.53733
1155.44	300	3125	2.7046
1823.22	300	3125	1.714
1768.24	300	3125	1.76729
1158.94	300	3125	2.69643
1769.97	300	3125	1.76557
1831.57	300	3125	1.70619
1167.81	300	3125	2.67595
1916.4	300	3125	1.63066
1409.79	300	3125	2.21664
1252.15	300	3125	2.49571
1935.97	300	3125	1.61418
1126.32	300	3125	2.77452
1604.95	300	3125	1.9471
2178.14	300	3125	1.43471
1062.59	300	3125	2.94093
1779.32	300	3125	1.75629
1918.44	300	3125	1.62893
1415.06	300	3125	2.20839
1709.4	300	3125	1.82813
1690.96	300	3125	1.84806
1436.48	300	3125	2.17546
1996.04	300	3125	1.5656
1404.15	300	3125	2.22555
1491.33	300	3125	2.09545
2155.5	300	3125	1.44978
1239.53	300	3125	2.52112
1599.82	300	3125	1.95334
2023.99	300	3125	1.54398
1081.95	300	3125	2.8883
1861.52	300	3125	1.67874
2067.9	300	3125	1.51119
1140.18	300	3125	2.7408
1900.59	300	3125	1.64423
1536.51	300	3125	2.03383
1236.4	300	3125	2.5275
2048.2	300	3125	1.52573
1367.24	300	3125	2.28563
1518.07	300	3125	2.05853
1964.5	300	3125	1.59074
1384.67	300	3125	2.25686
1414.56	300	3125	2.20917
2218.12	300	3125	1.40885
1260.22	300	3125	2.47973
1752.41	300	3125	1.78326
1913.36	300	3125	1.63325
1085.95	300	3125	2.87766
2130.56	300	3125	1.46675
1621.39	300	3125	1.92736
1249.13	300	3125	2.50174
2146.82	300	3125	1.45564
1366.82	300	3125	2.28633
1443.47	300	3125	2.16492
2119.47	300	3125	1.47443
1403.86	300	3125	2.22601
1342.51	300	3125	2.32773
2169.65	300	3125	1.44032
1344.9	300	3125	2.32359
1699.14	300	3125	1.83917
1809.74	300	3125	1.72677
992.619	300	3125	3.14824
1838.18	300	3125	1.70005
1672.81	300	3125	1.86811
1217.02	300	3125	2.56775
2092.05	300	3125	1.49375
1746.32	300	3125	1.78948
1097.71	300	3125	2.84684
1837.21	300	3125	1.70095
1624.07	300	3125	1.92418
1335.8	300	3125	2.33942
2006.39	300	3125	1.55752
1083.55	300	3125	2.88404
1667.16	300	3125	1.87445
2139.39	300	3125	1.4607
1047.52	300	3125	2.98324
1889.06	300	3125	1.65426
1741.88	300	3125	1.79404
933.529	300	3125	3.34751
1924.83	300	3125	1.62352
1753.7	300	3125	1.78195
966.41	300	3125	3.23362
1923.85	300	3125	1.62435
1355.13	300	3125	2.30605
1455.34	300	3125	2.14726
1673.38	300	3125	1.86748
1419.83	300	3125	2.20097
1593.25	300	3125	1.9614
1725.34	300	3125	1.81124
1472.42	300	3125	2.12236
1500.1	300	3125	2.08319
1872.91	300	3125	1.66853
1122.46	300	3125	2.78406
2011.79	300	3125	1.55334
1459.72	300	3125	2.14082
1231.53	300	3125	2.53749
1885.07	300	3125	1.65776
1388.62	300	3125	2.25044
1480.78	300	3125	2.11037
1842.68	300	3125	1.6959
1448.95	300	3125	2.15673
1352.1	300	3125	2.31122
2055.81	300	3125	1.52008
1097.12	300	3125	2.84837
1600.04	300	3125	1.95308
1579.63	300	3125	1.97831
1258.12	300	3125	2.48386
1596.12	300	3125	1.95787
1890.28	300	3125	1.65319
1216.58	300	3125	2.56868
1813.37	300	3125	1.72331
1728.19	300	3125	1.80825
1520.24	300	3125	2.0556
2073.28	300	3125	1.50727
1378.56	300	3125	2.26686
1492.43	300	3125	2.0939
2077.17	300	3125	1.50445
1305.77	300	3125	2.39322
1312.83	300	3125	2.38035
1908.43	300	3125	1.63747
1122.65	300	3125	2.78359
1944.9	300	3125	1.60677
1683.34	300	3125	1.85643
1284.24	300	3125	2.43335
1944.11	300	3125	1.60742
1577.71	300	3125	1.98072
1217.26	300	3125	2.56724
1920.09	300	3125	1.62753
1464.91	300	3125	2.13324
1540.01	300	3125	2.02921
2080.04	300	3125	1.50237
1271.95	300	3125	2.45686
1671.44	300	3125	1.86965
1894.57	300	3125	1.64945
1179.75	300	3125	2.64887
1542.66	300	3125	2.02572
1672.8	300	3125	1.86813
1396.3	300	3125	2.23806
2051.66	300	3125	1.52316
1589.59	300	3125	1.96592
1196.68	300	3125	2.61139
2058.07	300	3125	1.51841
1595.91	300	3125	1.95813
1168.73	300	3125	2.67384
2171.39	300	3125	1.43917
1327.37	300	3125	2.35428
1594.65	300	3125	1.95968
1970.82	300	3125	1.58563
1119.21	300	3125	2.79215
2013.54	300	3125	1.55199
1720.46	300	3125	1.81637
1046.77	300	3125	2.98537
2011.43	300	3125	1.55362
1565.02	300	3125	1.99678
1254.35	300	3125	2.49133
2078.55	300	3125	1.50345
1571.24	300	3125	1.98888
1210.33	300	3125	2.58194
1890.16	300	3125	1.6533
1389.77	300	3125	2.24857
1793.54	300	3125	1.74236
1946.83	300	3125	1.60517
1280.81	300	3125	2.43986
1745.81	300	3125	1.79
1831.81	300	3125	1.70596
1035.57	300	3125	3.01766
1892.09	300	3125	1.65161
1800.47	300	3125	1.73566
1442.09	300	3125	2.16699
1763.49	300	3125	1.77205
1290.88	300	3125	2.42083
1654.71	300	3125	1.88855
1878.24	300	3125	1.66379
1451.54	300	3125	2.15289
1662.99	300	3125	1.87915
2110.33	300	3125	1.48081
1186	300	3125	2.63491
1802.26	300	3125	1.73393
2052.56	300	3125	1.52249
1268.87	300	3125	2.46282
1817.79	300	3125	1.71912
1658.73	300	3125	1.88397
1513.59	300	3125	2.06463
1568.1	300	3125	1.99286
1803.79	300	3125	1.73246
1444.88	300	3125	2.16281
1858.92	300	3125	1.68108
1487.7	300	3125	2.10056
1546.87	300	3125	2.02021
2012.01	300	3125	1.55317
1386.59	300	3125	2.25373
1658.36	300	3125	1.88439
2182.73	300	3125	1.43169
1258.76	300	3125	2.4826
1904.55	300	3125	1.64081
1778.08	300	3125	1.75751
1213.67	300	3125	2.57484
2220.93	300	3125	1.40707
1696.12	300	3125	1.84244
1125.78	300	3125	2.77585
2176.59	300	3125	1.43573
1700.75	300	3125	1.83742
1333.57	300	3125	2.34333
2150.5	300	3125	1.45315
1384.86	300	3125	2.25655
1236.27	300	3125	2.52776
2064.18	300	3125	1.51392
1231.51	300	3125	2.53754
1766.43	300	3125	1.7691
1839.96	300	3125	1.69841
1159.95	300	3125	2.69408
2189.77	300	3125	1.42709
1624.66	300	3125	1.92348
978.107	300	3125	3.19495
2099.13	300	3125	1.48871
1491.53	300	3125	2.09516
1518.98	300	3125	2.0573
2037.17	300	3125	1.53399
1549.05	300	3125	2.01737
1648.12	300	3125	1.8961
2020.87	300	3125	1.54636
1075.02	300	3125	2.90692
1788.46	300	3125	1.74731
2072.98	300	3125	1.50749
1080.89	300	3125	2.89114
2036.65	300	3125	1.53438
1920.17	300	3125	1.62746
1118.41	300	3125	2.79415
1890.4	300	3125	1.65309
1887.9	300	3125	1.65528
1346.55	300	3125	2.32075
1981.52	300	3125	1.57707
1546.39	300	3125	2.02084
1600.59	300	3125	1.95241
1995.4	300	3125	1.5661
1418.19	300	3125	2.20351
1558.73	300	3125	2.00484
1881.22	300	3125	1.66116
1352.32	300	3125	2.31084
1649.95	300	3125	1.894
2128.8	300	3125	1.46796
1245.84	300	3125	2.50835
2051.05	300	3125	1.52361
1666.99	300	3125	1.87464
1396.11	300	3125	2.23836
2002.06	300	3125	1.56089
1316.12	300	3125	2.3744
1611.46	300	3125	1.93924
2051.74	300	3125	1.5231
1333.31	300	3125	2.34379
1563.1	300	3125	1.99923
2049.57	300	3125	1.52471
1167.17	300	3125	2.67742
1911.1	300	3125	1.63518
1791.05	300	3125	1.74479
1363.06	300	3125	2.29264
1724.05	300	3125	1.81259
1786.31	300	3125	1.74942
1151.09	300	3125	2.71482
1834.86	300	3125	1.70313
1575.32	300	3125	1.98372
1313.38	300	3125	2.37936
1992.14	300	3125	1.56866
1334.72	300	3125	2.34132
1579.23	300	3125	1.97881
2300.23	300	3125	1.35856
1179.14	300	3125	2.65024
1553.56	300	3125	2.01151
1968.9	300	3125	1.58718
1129.84	300	3125	2.76588
2004.31	300	3125	1.55914
1780.36	300	3125	1.75526
1129.43	300	3125	2.76688
2067.59	300	3125	1.51142
1628.49	300	3125	1.91896
1217.99	300	3125	2.5657
2328.95	300	3125	1.34181
1202.7	300	3125	2.59832
1449.15	300	3125	2.15644
2116.01	300	3125	1.47684
1336.19	300	3125	2.33874
1596.09	300	3125	1.95791
2003.84	300	3125	1.55951
1174.93	300	3125	2.65973
1869.86	300	3125	1.67125
1955.63	300	3125	1.59795
1254.73	300	3125	2.49058
2095.32	300	3125	1.49142
1605.69	300	3125	1.9462
1411.54	300	3125	2.21389
2157.35	300	3125	1.44854
1554.22	300	3125	2.01065
1435.1	300	3125	2.17755
1918.81	300	3125	1.62861
1334.7	300	3125	2.34135
1687.75	300	3125	1.85158
1754.75	300	3125	1.78088
1260.89	300	3125	2.47841
1772.9	300	3125	1.76265
1887.27	300	3125	1.65583
1081.91	300	3125	2.88841
2011.72	300	3125	1.5534
1744.81	300	3125	1.79103
1248.15	300	3125	2.50371
2147.74	300	3125	1.45502
1488.38	300	3125	2.0996
1560.59	300	3125	2.00245
1775.38	300	3125	1.76019
1202.19	300	3125	2.59942
1630.75	300	3125	1.9163
1931.43	300	3125	1.61797
1287.82	300	3125	2.42658
2166.57	300	3125	1.44237
1451.49	300	3125	2.15296
1177.6	300	3125	2.6537
2088.88	300	3125	1.49602
1754.42	300	3125	1.78122
1327.43	300	3125	2.35417
1882.11	300	3125	1.66037
1630.45	300	3125	1.91665
1395.17	300	3125	2.23987
2124.38	300	3125	1.47102
1449.47	300	3125	2.15596
1689.93	300	3125	1.84919
1754.78	300	3125	1.78085
1452.17	300	3125	2.15195
1510.09	300	3125	2.06941
1913.49	300	3125	1.63314
1073.85	300	3125	2.91009
1787.73	300	3125	1.74803
1850.74	300	3125	1.68851
1176.19	300	3125	2.65688
2018.08	300	3125	1.5485
1643.14	300	3125	1.90185
1530.41	300	3125	2.04194
1766.83	300	3125	1.7687
1298.3	300	3125	2.40699
1626.58	300	3125	1.92121
2000.76	300	3125	1.56191
1285.04	300	3125	2.43183
1716.52	300	3125	1.82054
1880.3	300	3125	1.66197
1196.41	300	3125	2.61198
1704.69	300	3125	1.83318
1613.29	300	3125	1.93704
1359.85	300	3125	2.29805
1945.57	300	3125	1.60621
1506.79	300	3125	2.07395
1313.24	300	3125	2.37961
1902	300	3125	1.64301
1322.64	300	3125	2.3627
1551.32	300	3125	2.01441
2092.17	300	3125	1.49366
1404.08	300	3125	2.22566
1601.51	300	3125	1.95128
1926.72	300	3125	1.62193
1256.27	300	3125	2.48752
1764.81	300	3125	1.77073
1802.92	300	3125	1.7333
1204.26	300	3125	2.59495
2099.13	300	3125	1.48871
1340.07	300	3125	2.33197
1367.98	300	3125	2.28439
1986.35	300	3125	1.57324
1249.73	300	3125	2.50054
1450.39	300	3125	2.15459
2144.9	300	3125	1.45694
1346.83	300	3125	2.32026
1709.5	300	3125	1.82802
1920.3	300	3125	1.62735
1236.68	300	3125	2.52693
2100.24	300	3125	1.48793
1508.53	300	3125	2.07155
1355.89	300	3125	2.30476
2078.17	300	3125	1.50373
1697.76	300	3125	1.84066
1218.51	300	3125	2.56461
2255.98	300	3125	1.38521
1672.46	300	3125	1.86851
1392.6	300	3125	2.244
1919.21	300	3125	1.62827
1596.28	300	3125	1.95768
1592.78	300	3125	1.96198
1930.76	300	3125	1.61853
1269.92	300	3125	2.46078
1895.57	300	3125	1.64858
1948.96	300	3125	1.60342
1008.61	300	3125	3.09832
2265.88	300	3125	1.37916
1685.75	300	3125	1.85377
1423.51	300	3125	2.19528
1852.9	300	3125	1.68655
1476.1	300	3125	2.11707
1447.78	300	3125	2.15848
1985.63	300	3125	1.57381
1366.6	300	3125	2.2867
1460.22	300	3125	2.14009
2142.32	300	3125	1.4587
1385.27	300	3125	2.25588
1884.1	300	3125	1.65862
1866.09	300	3125	1.67462
1118.94	300	3125	2.79282
1947.75	300	3125	1.60442
1967.03	300	3125	1.58869
1107.05	300	3125	2.82282
2041.68	300	3125	1.5306
1440.17	300	3125	2.16988
1540.69	300	3125	2.02831
1898.89	300	3125	1.6457
1545.34	300	3125	2.02221
1584.93	300	3125	1.9717
2133.03	300	3125	1.46505
1180.07	300	3125	2.64815
1520.39	300	3125	2.05539
1973.16	300	3125	1.58375
1223.75	300	3125	2.55363
1929.49	300	3125	1.6196
1792.51	300	3125	1.74337
1109.78	300	3125	2.81587
2120.98	300	3125	1.47338
1632.59	300	3125	1.91414
1292.25	300	3125	2.41826
2003.53	300	3125	1.55975
1309.15	300	3125	2.38705
1584.76	300	3125	1.97191
1893.45	300	3125	1.65043
1373.68	300	3125	2.27491
1691.31	300	3125	1.84768
1978.71	300	3125	1.57931
1173.65	300	3125	2.66263
1822.12	300	3125	1.71504
1782.78	300	3125	1.75288
1430.96	300	3125	2.18385
1780.19	300	3125	1.75543
1449.85	300	3125	2.1554
1328.06	300	3125	2.35306
2018.26	300	3125	1.54836
1496.8	300	3125	2.08779
1302.24	300	3125	2.39971
1925.27	300	3125	1.62315
1331.32	300	3125	2.34729
1480.13	300	3125	2.1113
2076.65	300	3125	1.50483
1138.59	300	3125	2.74462
1728.91	300	3125	1.8075
1829.78	300	3125	1.70786
1247.01	300	3125	2.50599
1935.87	300	3125	1.61426
1335.74	300	3125	2.33953
1522.36	300	3125	2.05273
1810.18	300	3125	1.72635
1579.53	300	3125	1.97844
1192.43	300	3125	2.6207
2043.26	300	3125	1.52942
1387.31	300	3125	2.25256
1367.09	300	3125	2.28588
1972.44	300	3125	1.58433
1256.56	300	3125	2.48695
1556.99	300	3125	2.00708
1813.39	300	3125	1.72329
1267.47	300	3125	2.46554
1829.92	300	3125	1.70772
1818.76	300	3125	1.7182
1143.67	300	3125	2.73243
2000.72	300	3125	1.56194
1370.9	300	3125	2.27952
1438.42	300	3125	2.17252
1942.48	300	3125	1.60877
1574.1	300	3125	1.98526
1326.45	300	3125	2.35591
2058.4	300	3125	1.51817
1388.27	300	3125	2.251
1445.72	300	3125	2.16155
1844.78	300	3125	1.69397
1297.67	300	3125	2.40816
1747.34	300	3125	1.78843
1889.4	300	3125	1.65396
1115.91	300	3125	2.80041
2046.51	300	3125	1.52699
1569.01	300	3125	1.9917
1298.9	300	3125	2.40588
2069.56	300	3125	1.50998
1463.95	300	3125	2.13464
1526.69	300	3125	2.04691
1798.1	300	3125	1.73795
1486.44	300	3125	2.10234
1431.43	300	3125	2.18313
1895.96	300	3125	1.64824
1344.01	300	3125	2.32513
1656.01	300	3125	1.88707
1802.41	300	3125	1.73379
1242.24	300	3125	2.51562
1792.45	300	3125	1.74342
1633.32	300	3125	1.91328
1352.45	300	3125	2.31062
1849.85	300	3125	1.68933
1579.42	300	3125	1.97857
1434.15	300	3125	2.17899
2164.02	300	3125	1.44407
1212.06	300	3125	2.57826
1778.67	300	3125	1.75693
1685.73	300	3125	1.8538
1327.99	300	3125	2.35318
1713.23	300	3125	1.82404
1909.99	300	3125	1.63613
1300.1	300	3125	2.40366
1878.78	300	3125	1.66331
1441.46	300	3125	2.16794
1451.75	300	3125	2.15257
1887.11	300	3125	1.65597
1463.31	300	3125	2.13557
1439.55	300	3125	2.17082
1987.99	300	3125	1.57194
1133.35	300	3125	2.75731
1619.77	300	3125	1.92929
2004.82	300	3125	1.55874
1409.63	300	3125	2.21689
1590.89	300	3125	1.96431
1945.75	300	3125	1.60606
1242.05	300	3125	2.516
1868.7	300	3125	1.67229
1899.35	300	3125	1.6453
1145.27	300	3125	2.72861
2061.84	300	3125	1.51564
1495.87	300	3125	2.08909
1367.02	300	3125	2.28599
2269.29	300	3125	1.37708
1375.92	300	3125	2.27121
1449.92	300	3125	2.15529
2135.56	300	3125	1.46332
1141.96	300	3125	2.73652
1491.19	300	3125	2.09564
1975.33	300	3125	1.58201
1296.92	300	3125	2.40955
1590.51	300	3125	1.96478
1787.65	300	3125	1.74811
1387.68	300	3125	2.25196
1709.84	300	3125	1.82766
1455.41	300	3125	2.14716
1245.12	300	3125	2.5098
2059.36	300	3125	1.51746
1527.81	300	3125	2.04541
1334.68	300	3125	2.34139
2056.37	300	3125	1.51967
1187.35	300	3125	2.63191
1568.19	300	3125	1.99274
2136.38	300	3125	1.46275
1020.78	300	3125	3.06138
1981.29	300	3125	1.57726
1714.63	300	3125	1.82255
1147	300	3125	2.7245
2061.36	300	3125	1.51599
1903.1	300	3125	1.64206
1023.83	300	3125	3.05226
2112.95	300	3125	1.47897
1491.87	300	3125	2.09469
1483.4	300	3125	2.10665
2048.59	300	3125	1.52544
1392.33	300	3125	2.24444
1760.27	300	3125	1.7753
1790.03	300	3125	1.74578
1272.34	300	3125	2.4561
1655.42	300	3125	1.88774
1947.27	300	3125	1.60481
1173.09	300	3125	2.6639
1932.24	300	3125	1.61729
1817.82	300	3125	1.71909
1303.08	300	3125	2.39816
1907.23	300	3125	1.6385
1391.39	300	3125	2.24596
1556.92	300	3125	2.00717
1867.67	300	3125	1.67321
1274.18	300	3125	2.45256
1789.07	300	3125	1.74672
1880.98	300	3125	1.66137
1032.09	300	3125	3.02784
1697.13	300	3125	1.84134
1977.69	300	3125	1.58013
1103.34	300	3125	2.83231
2086.6	300	3125	1.49765
1614.35	300	3125	1.93576
1142.35	300	3125	2.73559
2015.09	300	3125	1.5508
1496.99	300	3125	2.08752
1221.19	300	3125	2.55898
2034.44	300	3125	1.53605
1252.91	300	3125	2.49419
1505.54	300	3125	2.07567
2071.35	300	3125	1.50868
1300.87	300	3125	2.40224
1881.26	300	3125	1.66112
2017.65	300	3125	1.54883
1135.21	300	3125	2.75279
2036.95	300	3125	1.53416
1644.98	300	3125	1.89972
1350.23	300	3125	2.31442
2030.63	300	3125	1.53893
1481.33	300	3125	2.10959
1409.55	300	3125	2.21702
2325.92	300	3125	1.34355
1121.38	300	3125	2.78674
1491.37	300	3125	2.09539
2006.35	300	3125	1.55755
1166.21	300	3125	2.67962
1657.75	300	3125	1.88509
1859.22	300	3125	1.68081
1267.9	300	3125	2.46471
1807.72	300	3125	1.7287
1809.01	300	3125	1.72746
1331.52	300	3125	2.34694
1841.73	300	3125	1.69677
1511.58	300	3125	2.06737
1105.97	300	3125	2.82557
2183.97	300	3125	1.43088
1516.81	300	3125	2.06024
1305.18	300	3125	2.39431
2054.61	300	3125	1.52097
1252.51	300	3125	2.49499
1484.67	300	3125	2.10484
1982.99	300	3125	1.5759
1039.15	300	3125	3.00727
1855.74	300	3125	1.68396
1835.26	300	3125	1.70276
1029.03	300	3125	3.03684
1740.88	300	3125	1.79507
1676.81	300	3125	1.86366
1192.01	300	3125	2.62162
1884.34	300	3125	1.65841
1500.27	300	3125	2.08296
1230.77	300	3125	2.53906
1794.03	300	3125	1.74189
1188.79	300	3125	2.62872
1779.57	300	3125	1.75604
1888.63	300	3125	1.65464
1145.24	300	3125	2.72869
1864.16	300	3125	1.67636
1509.1	300	3125	2.07077
1436.75	300	3125	2.17505
1876.44	300	3125	1.66539
1713.08	300	3125	1.8242
1235.95	300	3125	2.52842
2179.03	300	3125	1.43412
1327.48	300	3125	2.35408
1707.81	300	3125	1.82983
1599.22	300	3125	1.95408
1615.14	300	3125	1.93482
1486.23	300	3125	2.10264
1968.22	300	3125	1.58773
1269.07	300	3125	2.46243
1610.09	300	3125	1.94089
1707.78	300	3125	1.82986
1225.86	300	3125	2.54923
1843.95	300	3125	1.69473
1810.43	300	3125	1.72611
1122.4	300	3125	2.78421
1882.28	300	3125	1.66022
1896.15	300	3125	1.64808
1028.42	300	3125	3.03864
2076.75	300	3125	1.50476
1273.33	300	3125	2.45419
1576.2	300	3125	1.98262
1868.89	300	3125	1.67212
1295.22	300	3125	2.41272
1600.99	300	3125	1.95192
1823.88	300	3125	1.71338
1196.1	300	3125	2.61266
1728.16	300	3125	1.80828
1662.94	300	3125	1.8792
1153.4	300	3125	2.70938
1879.07	300	3125	1.66306
1614.56	300	3125	1.93551
1372.22	300	3125	2.27733
2119.57	300	3125	1.47436
1263.24	300	3125	2.4738
1480.48	300	3125	2.1108
2111.05	300	3125	1.48031
1197.62	300	3125	2.60934
1731.26	300	3125	1.80504
2002.24	300	3125	1.56075
1182.63	300	3125	2.64242
1587.78	300	3125	1.96816
2010.03	300	3125	1.5547
1056.94	300	3125	2.95665
1827.82	300	3125	1.70969
1641.1	300	3125	1.90421
1342.82	300	3125	2.32719
2041.71	300	3125	1.53058
1630.64	300	3125	1.91643
1282.69	300	3125	2.43629
2003.12	300	3125	1.56007
1370.47	300	3125	2.28024
1435.85	300	3125	2.17641
2002.68	300	3125	1.56041
1319.26	300	3125	2.36875
1603.15	300	3125	1.94929
1488.51	300	3125	2.09941
1069.56	300	3125	2.92176
2192.26	300	3125	1.42547
1456.03	300	3125	2.14625
1304.93	300	3125	2.39476
2115.05	300	3125	1.47751
1443.64	300	3125	2.16467
1199.3	300	3125	2.60569
2156.3	300	3125	1.44924
1455.38	300	3125	2.14721
1363.58	300	3125	2.29176
2059.72	300	3125	1.5172
1303.52	300	3125	2.39735
1699.58	300	3125	1.83869
1923.76	300	3125	1.62442
1402.89	300	3125	2.22754
1698.54	300	3125	1.83982
1676.9	300	3125	1.86356
1348.2	300	3125	2.31791
1946.99	300	3125	1.60504
1571.03	300	3125	1.98914
1367.85	300	3125	2.28461
1753.68	300	3125	1.78197
1381.07	300	3125	2.26274
1339.11	300	3125	2.33364
2212.59	300	3125	1.41237
1329.65	300	3125	2.35024
1435.8	300	3125	2.17649
1984.81	300	3125	1.57446
1164.52	300	3125	2.68351
2080.43	300	3125	1.50209
1488.46	300	3125	2.09949
1219.33	300	3125	2.56288
1893.61	300	3125	1.65029
1737.46	300	3125	1.7986
1064.22	300	3125	2.93642
[truncated: 47,953 more rows]
